# Supplementary material for: Polarization-resolved and helicity-resolved Raman spectra of monolayer XP3 (X = Ge and In)
Source: Royal Society of Chemistry journal article supplement (doi:10.1039/d2cp03925g), 2022-12-13
Supplement: d2cp03925g1.pdf [file d2cp03925g1.pdf]

Supporting Information

## Polarization-resolved and helicity-resolved Raman spectra of monolayer $XP_3$ (X=Ge and In)

Haiming Huang<sup>a,b</sup>, Huijun Liu<sup>b</sup>, Mingquan Ding<sup>a,b</sup>, Weiliang Wang<sup>c,\*</sup>  
and Shaolin Zhang<sup>a,b,\*</sup>

<sup>a</sup> Research Center for Advanced Information Materials (CAIM), Huangpu Research and Graduate School of Guangzhou University, Guangzhou 510555, China.

<sup>b</sup> Solid State Physics & Material Research Laboratory, School of Physics and Materials Science, Guangzhou University, Guangzhou 510006, China.

<sup>c</sup> School of Physics, Guangdong Province Key Laboratory of Display Material and Technology, Sun Yat-sen University, Guangzhou 510275, China.

\* Corresponding authors. Electronic mail: wangwl2@mail.sysu.edu.cn (W. Wang), slzhang@gzhu.edu.cn (S. Zhang)

### *Structural details for monolayer $XP_3$ (X=Ge, In)*

Here is the POSCAR information for optimized  $GeP_3$  monolayer.

----- POSCAR file -----

GeP3\_mono

6.94096652600000

0.5002831386450043 -0.8665158144574282 0.0000000000000000

0.5002831386450043 0.8665158144574282 0.0000000000000000

0.0000000000000000 0.0000000000000000 4.3172736957890425

Ge P

2 6

Direct

0.3333333429999996 0.6666666870000029 0.9763144396388121

0.6666666269999979 0.3333333129999971 0.0036056361528162

0.8532868839873115 0.1467130860127082 0.9857248616266605

0.1670175341884261 0.8329825258115646 0.0257215953347332  
0.8532869439873093 0.7065737679745625 0.9857248616266605  
0.1670175041884307 0.3340350383768426 0.0257215953347332  
0.2934262020254332 0.1467131160127036 0.9857248616266605  
0.6659649316231511 0.8329824658115668 0.0257215953347332

-----

Here is the POSCAR information for optimized InP<sub>3</sub> monolayer.

----- POSCAR file -----

InP3 mono

1.00114000000000  
7.5571854270935299 -0.0000000000006986 0.0000000000000001  
-3.7785927135980968 6.5447145610357662 0.0000000000000000  
0.0000000000000002 -0.0000000000000005 29.9658389436042896

P In

6 2

Direct

0.5243906679417273 0.4756093320095371 0.0893529420716831  
0.5243906679798479 0.0487813359189241 0.0893529420716831  
0.9512186641145569 0.4756093320095371 0.0893529420716831  
0.8089426455597709 0.1910573545092793 0.1303137263949821  
0.8089426455216503 0.6178853505998924 0.1303137263949821  
0.3821146791895980 0.1910573545092793 0.1303137263949821  
0.0000000000000000 0.0000000000000000 0.1089165405801138  
0.3333333432638810 0.6666666865188162 0.1107501278865515

-----

Table SI Raman tensor elements a, b, c and d for monolayer GeP<sub>3</sub>.

| Mode          | A <sub>1</sub> (88)    |                       | A <sub>1</sub> (93)    |                       | A <sub>1</sub> (314)    |                        | A <sub>1</sub> (327)    |                       | A <sub>1</sub> (448)    |                         |
|---------------|------------------------|-----------------------|------------------------|-----------------------|-------------------------|------------------------|-------------------------|-----------------------|-------------------------|-------------------------|
| Laser(nm)     | 633                    | 532                   | 633                    | 532                   | 633                     | 532                    | 633                     | 532                   | 633                     | 532                     |
| a(arb. units) | 32e <sup>-i×25°</sup>  | 80 e <sup>i×56°</sup> | 35 e <sup>-i×71°</sup> | 58 e <sup>i×82°</sup> | 103 e <sup>-i×68°</sup> | 43 e <sup>-i×64°</sup> | 101 e <sup>-i×15°</sup> | 57 e <sup>i×85°</sup> | 197 e <sup>-i×16°</sup> | 190 e <sup>-i×10°</sup> |
| b(arb. units) | 13 e <sup>-i×2°</sup>  | 12 e <sup>-i×0°</sup> | 21 e <sup>i×4°</sup>   | 16 e <sup>i×8°</sup>  | 36 e <sup>-i×2°</sup>   | 26 e <sup>i×2°</sup>   | 27 e <sup>-i×7°</sup>   | 25 e <sup>i×7°</sup>  | 92 e <sup>-i×4°</sup>   | 78 e <sup>i×4°</sup>    |
| Mode          | E(83)                  |                       | E(97)                  |                       | E(127)                  |                        | E(268)                  |                       | E(329)                  |                         |
| Laser(nm)     | 633                    | 532                   | 633                    | 532                   | 633                     | 532                    | 633                     | 532                   | 633                     | 532                     |
| c(arb. units) | 17 e <sup>-i×69°</sup> | 11 e <sup>i×68°</sup> | 24 e <sup>i×40°</sup>  | 17 e <sup>i×34°</sup> | 36 e <sup>-i×53°</sup>  | 11 e <sup>i×38°</sup>  | 30 e <sup>-i×30°</sup>  | 7 e <sup>-i×45°</sup> | 35 e <sup>i×13°</sup>   | 41 e <sup>i×67°</sup>   |
| d(arb. units) | 4 e <sup>i×52°</sup>   | 3 e <sup>-i×75°</sup> | 4 e <sup>-i×56°</sup>  | 6 e <sup>i×12°</sup>  | 2 e <sup>i×23°</sup>    | 6 e <sup>-i×50°</sup>  | 24 e <sup>i×7°</sup>    | 38 e <sup>i×36°</sup> | 3 e <sup>-i×60°</sup>   | 6 e <sup>-i×60°</sup>   |
| Mode          | E(412)                 |                       | E(435)                 |                       |                         |                        |                         |                       |                         |                         |
| Laser(nm)     | 633                    | 532                   | 633                    | 532                   |                         |                        |                         |                       |                         |                         |
| c(arb. units) | 33 e <sup>i×3°</sup>   | 50 e <sup>i×82°</sup> | 53 e <sup>i×35°</sup>  | 74 e <sup>i×66°</sup> |                         |                        |                         |                       |                         |                         |
| d(arb. units) | 20 e <sup>i×5°</sup>   | 29 e <sup>i×6°</sup>  | 22 e <sup>i×30°</sup>  | 13 e <sup>i×32°</sup> |                         |                        |                         |                       |                         |                         |

Table SII Raman tensor elements e, f, g and h for monolayer InP<sub>3</sub>.

| Mode          | A <sub>1g</sub> (64)   |                         | A <sub>1g</sub> (281)   |                         | A <sub>1g</sub> (452)   |                        |                         |                         |     |     |
|---------------|------------------------|-------------------------|-------------------------|-------------------------|-------------------------|------------------------|-------------------------|-------------------------|-----|-----|
| Laser(nm)     | 633                    | 532                     | 633                     | 532                     | 633                     | 532                    |                         |                         |     |     |
| e(arb. units) | 18 e <sup>-i×82°</sup> | 35 e <sup>-i×133°</sup> | 171 e <sup>i×150°</sup> | 186 e <sup>i×155°</sup> | 119 e <sup>-i×26°</sup> | 119 e <sup>i×3°</sup>  |                         |                         |     |     |
| f(arb. units) | 7 e <sup>i×178°</sup>  | 4 e <sup>-i×63°</sup>   | 2 e <sup>i×63°</sup>    | 11 e <sup>-i×25°</sup>  | 13 e <sup>-i×8°</sup>   | 25 e <sup>-i×16°</sup> |                         |                         |     |     |
| Mode          | E <sub>g</sub> (68)    |                         | E <sub>g</sub> (78)     |                         | E <sub>g</sub> (275)    |                        | E <sub>g</sub> (413)    |                         |     |     |
| Laser(nm)     | 633                    | 532                     | 633                     | 532                     | 633                     | 532                    | 633                     | 532                     | 633 | 532 |
| g(arb. units) | 24 e <sup>-i×15°</sup> | 16 e <sup>-i×4°</sup>   | 56 e <sup>-i×44°</sup>  | 41 e <sup>-i×6°</sup>   | 76 e <sup>-i×25°</sup>  | 63 e <sup>i×11°</sup>  | 92 e <sup>-i×160°</sup> | 73 e <sup>-i×105°</sup> |     |     |
| h(arb. units) | 1 e <sup>-i×112°</sup> | 2 e <sup>-i×51°</sup>   | 1 e <sup>i×57°</sup>    | 2 e <sup>i×65°</sup>    | 9 e <sup>-i×120°</sup>  | 11 e <sup>-i×78°</sup> | 16 e <sup>i×11°</sup>   | 21 e <sup>i×20°</sup>   |     |     |

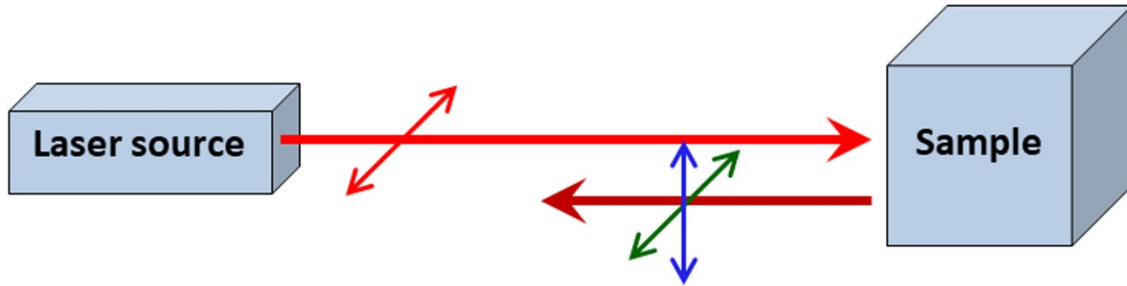

Figure S1 Schematic of the optical setup for polarization-resolved Raman spectroscopy. The polarization angle of the incident laser is changed by rotating the sample. The detection polarization of scattered light is kept parallel or perpendicular to the incident polarization. The optical setup for helicity-resolved Raman scattering measurements is similar but the samples are excited with circularly polarized light. The helicity of incident light is fixed and the helicity of Raman scattered light is selected to be the same or opposite to the incident light.

Table SIII Helicity-resolved Raman intensities of Raman active modes for monolayer GeP<sub>3</sub> when the wave vector  $k$  of incident light is along the y- and the z-axis.

| $k$    | Config                          | Laser (nm) | mode  |       |        |        |        |        |        |                     |                     |                      |                      |                      |
|--------|---------------------------------|------------|-------|-------|--------|--------|--------|--------|--------|---------------------|---------------------|----------------------|----------------------|----------------------|
|        |                                 |            | E(83) | E(97) | E(127) | E(268) | E(329) | E(412) | E(435) | A <sub>1</sub> (88) | A <sub>1</sub> (93) | A <sub>1</sub> (314) | A <sub>1</sub> (327) | A <sub>1</sub> (448) |
| y-axis | I <sup>co</sup> (arb. units)    | 633        | 0.73  | 1.02  | 1.38   | 0.22   | 0.20   | 0.12   | 0.28   | 4.34                | 3.99                | 2.74                 | 2.79                 | 7.85                 |
|        |                                 | 532        | 0.59  | 1.00  | 0.24   | 0.02   | 0.56   | 0.55   | 1.11   | 33.01               | 16.20               | 1.25                 | 1.51                 | 13.39                |
|        | I <sup>cross</sup> (arb. units) | 633        | 0.91  | 1.15  | 1.40   | 0.79   | 0.21   | 0.29   | 0.47   | 0.91                | 2.54                | 1.61                 | 0.93                 | 1.13                 |
|        |                                 | 532        | 0.73  | 1.46  | 0.55   | 2.88   | 0.62   | 1.28   | 1.23   | 23.53               | 12.09               | 0.59                 | 1.12                 | 2.56                 |
| z-axis | I <sup>co</sup> (arb. units)    | 633        | 0.00  | 0.00  | 0.00   | 0.00   | 0.00   | 0.00   | 0.00   | 8.94                | 9.59                | 7.76                 | 6.92                 | 14.78                |
|        |                                 | 532        | 0.00  | 0.00  | 0.00   | 0.00   | 0.00   | 0.00   | 0.00   | 110.50              | 52.39               | 2.72                 | 4.41                 | 27.32                |
|        | I <sup>cross</sup> (arb. units) | 633        | 5.83  | 8.18  | 11.00  | 1.77   | 1.64   | 0.98   | 2.27   | 0.00                | 0.00                | 0.00                 | 0.00                 | 0.00                 |
|        |                                 | 532        | 4.68  | 7.98  | 1.89   | 0.19   | 4.51   | 4.41   | 8.84   | 0.00                | 0.00                | 0.00                 | 0.00                 | 0.00                 |

Table SIV Helicity-resolved Raman intensities of Raman active modes for monolayer InP<sub>3</sub> when the wave vector  $k$  of incident light is along the y- and the z-axis.

| $k$    | Config                          | Laser(nm) | mode                |                     |                      |                      |                      |                       |                       |
|--------|---------------------------------|-----------|---------------------|---------------------|----------------------|----------------------|----------------------|-----------------------|-----------------------|
|        |                                 |           | E <sub>g</sub> (68) | E <sub>g</sub> (78) | E <sub>g</sub> (275) | E <sub>g</sub> (413) | A <sub>1g</sub> (64) | A <sub>1g</sub> (281) | A <sub>1g</sub> (452) |
| y-axis | I <sup>co</sup> (arb. units)    | 633       | 0.21                | 0.86                | 0.14                 | 0.09                 | 0.13                 | 0.66                  | 0.16                  |
|        |                                 | 532       | 0.18                | 0.92                | 0.19                 | 0.12                 | 1.09                 | 1.39                  | 0.38                  |
|        | I <sup>cross</sup> (arb. units) | 633       | 0.21                | 0.86                | 0.14                 | 0.10                 | 0.17                 | 0.66                  | 0.11                  |
|        |                                 | 532       | 0.20                | 0.93                | 0.21                 | 0.16                 | 0.93                 | 1.76                  | 0.17                  |
| z-axis | I <sup>co</sup> (arb. units)    | 633       | 0.00                | 0.00                | 0.00                 | 0.00                 | 0.53                 | 2.65                  | 0.53                  |
|        |                                 | 532       | 0.00                | 0.00                | 0.00                 | 0.00                 | 3.99                 | 6.26                  | 1.06                  |
|        | I <sup>cross</sup> (arb. units) | 633       | 1.66                | 6.85                | 1.10                 | 0.74                 | 0.00                 | 0.00                  | 0.00                  |
|        |                                 | 532       | 1.47                | 7.33                | 1.50                 | 0.94                 | 0.00                 | 0.00                  | 0.00                  |
